# Supplementary material for: Quantifying Transboundary Plastic Pollution in Marine Protected Areas Across the Mediterranean Sea
Source: Frontiers journal article supplement (doi:10.3389/fmars.2021.762235), 2022-01-10
Supplement: Data_Sheet_2.xlsx [file Data_Sheet_2.xlsx]

## Sheet: National MPAs
#	MAPAMED ID	NAME	COUNTRY	Median microplastics concentration (#/km2)	Median macroplastics concentration (g/km2)	Transboundary – microplastics (%)	Transboundary – macroplastics (%)	ORIGIN of microplastics (%)	ORIGIN of macroplastics (%)
1	5	Karaburun-Sazan	Albania	1.7049e+06	2790.49	20.44	25.66	80%Albania –11%Greece -9%Italy	75%Albania –16%Italy -7%Greece
2	1578	Cap Lindles	Algeria	452838	2667.47	8.4	11.35	91%Algeria -3%Italy -3%Morocco –3%Spain	88% Algeria –8%Morocco –2%Spain
3	25	Iles Habibas	Algeria	814912	2414.56	19.73	6.5	80%Algeria -11%Morocco –6%Spain -2%Italy	94% Algeria –5%Morocco –1%Spain
4	1580	Reghaia	Algeria	2.22301e+06	15890.8	1.6	8.9	98%Algeria	99% Algeria
5	353	El-Salum	Egypt	102591	6142.44	99.86	99.22	0%Egypt -81%Libya -8%Turkey- 6%Greece -4%Italy	1%Egypt -47%Turkey -20%Libya -18%Greece -7%Italy –5%Albania
6	986	Aiguamolls de l'Alt Emporda	Spain	405957	592.094	43.5	75.23	56%Spain – 43%France	25% Spain -68% France –5% Italy – 2%Algeria
7	1100	Alborán	Spain	102494	1630.77	96.04	98.64	4%Spain -56% Morocco -37%Algeria –2%Italy	1%Spain -76% Algeria - 21% Morocco
8	989	Archipielago de Cabrera	Spain	71701.6	1586.26	79.42	91.38	21%Spain -48% Algeria -17%France –10%Italy	9% Spain -84% Algeria - 4% France - 2% Italy
9	1015	Cabo De Palos - Islas Hormigas	Spain	164833	3684.21	69.53	93.83	30%Spain -66%Algeria –4%Italy	6% Spain -89% Algeria - 4% Morocco
10	1012	Cabo de Gata-Níjar	Spain	35004.8	1198.21	84.17	97.22	16% Spain 52%Algeria -16%Morocco – 14%Italy	3%Spain -88% Algeria – 7% Morocco
11	1026	Cap de Creus	Spain	81560.1	176.866	52.22	85.41	48% Spain - 51% France	15% Spain -78% France –4% Italy -2% Algeria
12	1582	Cap de Creus	Spain	81560.1	176.866	52.22	85.41	48% Spain - 51% France	15% Spain -78% France – 4% Italy 2% Algeria
13	1028	Cap de Santes Creus-Litoral meridional tarragoni	Spain	186374	413.56	0.49	61.47	99% Spain	39% Spain - 47% Algeria- 12% France
14	1568	Corredor de Migracion de Cetaceos del Mediterraneo	Spain	42778.9	1296.42	67.5	83.29	34% Spain -38% France – 15% Italy – 9% Algeria	17%Spain -59% Algeria – 18% France - 5% Italy
15	1588	Costa nord-est d'Eivissa-Tagomago	Spain	79918.5	630.178	24.83	84.4	75% Spain – 24% Algeria	16%Spain -79% Algeria -4% France
16	1037	Costes del Garraf	Spain	582687	2248.08	16.05	72.14	84% Spain -14% France – 1% Italy	28%Spain -60% Algeria -10% France - 2% Italy
17	1039	Costes del Maresme	Spain	3.01e+06	1050.25	0.01	45.2	100% Spain	55% Spain – 25% France- 17% Algeria -2% Morocco- 1% Italy
18	1044	Delta de l'Ebre	Spain	21806.5	754.993	1	64.47	99% Spain	34%Spain -60% Algeria – 4% France- 1% Italy
19	1541	Delta de l'Ebre	Spain	50896.1	885.818	17.72	60.5	98% Spain	40%Spain -42% Algeria - 6% France - 5% Italy - 5% Morocco
20	1045	Estrecho	Spain	365371	721.677	99.2	99.37	0%Spain -98% Morocco	1%Spain -70% Algeria -29% Morocco
21	1085	Freus d'Eivissa i Formentera	Spain	36707.3	908.993	2.054	90.77	98% Spain - 1% Algeria	10%Spain -68% Algeria – 9% Italy -8% France 5% Morocco
22	1089	Illa de Tabarca	Spain	246573	1504.81	0.13	81.84	100% Spain	18% Spain -78% Algeria -2% France -1% Morocco
23	1592	Illa de Tabarca	Spain	246573	1504.81	0.13	81.84	100% Spain	18% Spain -78% Algeria -2% France -1% Morocco
24	1091	Illes Columbretes	Spain	65151.6	684.795	2.78	84.69	97% Spain - 3% Algeria	15% Spain 80% Algeria - 2% France -2% Morocco
25	1094	Illes Malgrats	Spain	31869.7	0	5.47	-	94% Spain -5% Algeria	-
26	1102	Isla de Alborán	Spain	95565.4	1326.4	98.92	98.23	1% Spain -57% Algeria – 42% Morocco	2%Spain -71% Algeria- 27% Morocco
27	1115	Llevant De Mallorca - Cala Ratjada	Spain	90244.3	4297.48	38.35	91.69	62% Spain - 35% Algeria - 2% Italy	8%Spain -72% Algeria – 14% Morocco -4% France
28	1121	Migjorn De Mallorca	Spain	65166.6	857.152	31.35	87.93	69% Spain – 23% Algeria - 4% Italy -3% France	12% Spain -83% Algeria -3% France
29	1601	Punta de sa Creu	Spain	23485	553.127	99.27	88.59	1%Spain -99% Algeria	12% Spain -87% Algeria
30	1515	Sa Dragonera	Spain	2492.15	21.1204	0	83.99	100% Spain	16% Spain -80% Algeria -3% France
31	1141	Serra De Tramuntana	Spain	113435	2524.03	54.25	75.25	46%Spain -50% Algeria -2% Italy -2% Morocco	25% Spain -66% Algeria -8% France
32	1144	Serra Gelada	Spain	313152	1103.47	9.44	83.29	91% Spain – 9% Algeria	17%Spain -80% Algeria -2% France
33	1148	Ses Salines d'Eivissa I Formentera	Spain	26537.2	733.908	8.23	89.69	92% Spain -6% Algeria	10%Spain -81% Algeria -5% Morocco -2% France
34	438	Bouches De Bonifacio	France	83090.5	616.823	38.56	59.66	42%France -43%Italy -14%Algeria	40%France -50%Italy –6%Algeria -3%Spain
35	1571	Calanques	France	452413	652.801	12.7	28.23	87%France -8%Italy -3%Monaco -2%Algeria	73%France -26%Italy -1%Monaco
36	1514	Cap Corse et Agriate	France	46890.4	561.29	49.62	50.15	50%France -24%Italy -21%Algeria -2%Spain -1%Monaco 1%Morocco	50%France -40%Italy -6%Algeria -2%Spain -1%Monaco
37	386	Côte Bleue	France	1.66025e+06	465.272	0.94	14.75	99% France -1%Italy	86%France -14%Italy
38	409	Golfe du Lion	France	19500.7	279.979	14.27	14.13	85%France -5%Italy -4%Algeria -5%Spain -1%Monaco	86%France -8%Italy -5%Spain
39	1575	Port-Cros	France	963188	766.977	38.62	35.6	61%France -28%Italy -7%Monaco -3%Algeria	64%France -34%Italy -2%Monaco
40	412	Îles Bruzzi et Ilot aux Moines	France	26741.5	526.283	86.65	38.66	13% France – 41%Italy -45%Algeria	61%France -35%Italy -2%Spain -1%Monaco
41	443	Achéron and Kalamá and Elos Kalodikíou	Greece	1.12072e+06	2119.05	4.14	60.8	96%Greece –2%Italy -1%Albania	41% Greece -38%Albania -21%Italy
42	447	Alónnisos, Vóreies Sporádes	Greece	25336.6	206.937	6.2	12.18	94%Greece -6%Turkey	88% Greece -12%Turkey
43	456	Anatolikí Makedonía kai Thráki	Greece	31998.4	118.41	0.3	4.9	99%Greece -1%Turkey	95% Greece -5%Turkey
44	489	Gallikós, Axios, Loudiá, Aliákmonas, Alíkis Kitrós, Limnothálassa Kalochoríou	Greece	6.59992e+06	4919.12	0	0.51	100%Greece	100% Greece
45	1507	Gyaros	Greece	69028	296.464	2.33	24.21	97%Greece –2%Turkey	75% Greece -24%Turkey
46	531	Límnes tou Mesolongíou - Aitolikó, chamilóteres kai ekvolés tou Achelóou kai tou Évinou kai ta nisiá ton Echinádon	Greece	334566	1233.43	0.37	14.63	100%Greece	Greece 85% - 5%Turkey
47	582	Schinia Marathon	Greece	682744	1954.75	0.02	5.85	100%Greece	Greece 94% - 6%Turkey
48	1673	Tsaḯri tou Dímou Epanomís	Greece	938095	2420.57	0	0.07	100%Greece	100% Greece
49	609	Zákynthos	Greece	230946	220.074	5.22	38.89	95%Greece -2% Albania –3%Italy	61% Greece -25%Italy -11%Albania
50	1627	Áxios Délta (Chalástra)	Greece	6.59992e+06	5725.3	0	0	100%Greece	100% Greece
51	107	Labin, Rabac i uvala Prklog	Croatia	1009.37	0	0.12	-	100%Croatia	-
52	109	Lastovsko otoèje	Croatia	67891.1	1051.36	79.52	95.82	21%Croatia -46%Albania -22%Montenegro -11%Italy	4%Croatia -60%Albania -32%Italy -3%Montenegro
53	1744	Yam Rosh HaNikra - Akhziv	Israel	922678	43590	93.78	68.48	6%Israel -90%Lebanon -2% Syria -1%Egypt	32%Israel -55%Egypt -8%Lebanon -3%Turkey
54	644	Arcipelago Toscano	Italy	226967	1210.38	44.44	31.05	66%Italy -34%France	69%Italy -19%France -12%Algeria
55	638	Arcipelago di La Maddalena	Italy	255052	521.061	21.11	49.78	79%Italy -21%France	51%Italy -46%France -2%Spain
56	655	Capo Caccia - Isola Piana	Italy	204414	0	2.92	-	97%Italy -2%Algeria	-
57	658	Capo Carbonara	Italy	309917	290.326	61.4	50.62	39%Italy –44%Algeria -5%France –5%Morocco -4%Spain -3%Tunisia	49%Italy -29%France -12%Spain -7%Algeria -2%Tunisia
58	663	Capo Gallo - Isola delle Femmine	Italy	60616.1	0	19.5	-	98%Italy -2%Tunisia	-
59	665	Capo Rizzuto	Italy	358156	281.793	2.92	56.28	97%Italy -2%Albania	44%Italy -52%Albania -1%Greece
60	1690	Capo Testa - Punta Falcone	Italy	146585	857.332	36.51	58.28	63%Italy -37%France	43%Italy 34%France -21%Algeria -1%Spain
61	673	Costa degli Infreschi e della Masseta	Italy	137132	0	1.54	-	98%Italy -2%Algeria	-
62	783	Isola dell'Asinara	Italy	64769.7	341.721	41.84	77.55	58%Italy -37%Algeria -4%France	22%Italy -47%France -18%Algeria –10%Morocco -3%Spain
63	797	Isola di Ustica	Italy	168673	617.255	2.65	50.57	97%Italy -2%Algeria	50%Italy -29%Algeria -9%France -5%Spain -5%Tunisia
64	803	Isole Ciclopi	Italy	1.70519e+07	2241.51	0.51	5	100%Italy	95%Italy -4%Albania
65	811	Isole Egadi	Italy	109147	1081.66	23.81	70.33	76%Italy -13%Algeria -10%Tunisia	30%Italy -49%Algeria -9%France -7%Tunisia -4%Spain
66	812	Isole Pelagie	Italy	12485.1	241.537	21.91	93.04	78%Italy -20%Tunisia -2%Algeria	7%Italy – 66%Algeria -14%Tunisia –7%France -6%Spain
67	810	Isole di Ventotene e Santo Stefano	Italy	122479	476.911	0.05	5.44	100%Italy	95%Italy -5%France
68	846	Penisola del Sinis - Isola Mal di Ventre	Italy	94431.8	498.07	25.82	56.9	74%Italy -25%Algeria	43%Italy -42%France -9%France -5%France
69	851	Plemmirio	Italy	98176.8	8.6096	0.76	1.03	99%Italy	99%Italy
70	854	Porto Cesareo	Italy	234180	306.101	0.13	23.74	100%Italy	76%Italy -21%Albania -2%Greece
71	871	Regno di Nettuno	Italy	1.24295e+06	1228.12	0.1	15.56	100%Italy	88%Italy -6%France -5%Algeria
72	876	Santa Maria di Castellabate	Italy	398799	918.807	0.12	15.07	100%Italy	85%Italy -9%Algeria -3%France -2%Tunisia
73	882	Secche della Meloria	Italy	1.93217e+06	2145.26	0.03	28.23	100%Italy	72%Italy -26%France -1%Monacco
74	885	Secche di Tor Paterno	Italy	6.28079e+06	1481.48	0.36	5.02	100%Italy	95%Italy -4%France
75	904	Tavolara - Punta Coda Cavallo	Italy	250936	489.594	0.95	28.6	99%Italy -1%France	72%Italy -20%France -4%Spain -3%Algeria
76	909	Torre del Cerrano	Italy	1.48282e+06	12660.5	1.39	20.32	99%Italy -1%Albania	80%Italy -13%Albania -4%Croatia -3%Montenegro
77	927	Tyre Coast	Lebanon	1.66533e+06	7905.9	20.33	87.35	80% Lebanon -11%Israel -7%Egypt	13%Lebanon -50%Egypt -19%Turkey -16%Israel -2%Syria -1%Cyprus
78	929	Ain Al-Ghazalah Lagoon and Elba Island	Libya	271475	13053.6	2.28	83.39	98% Libya –1% Greece	17% Libya -39% Greece –35% Turkey -4% Italy -2% Algeria -1% Tunisia
79	934	Farwa Lagoon	Libya	45689.2	1115.27	1.72	73.08	98% Libya -1% Italy	27% Libya -66% Algeria –3% France -1% Spain –1% Italy –1% Tunisia
80	957	Al-Hoceima	Morocco	519055	2464.96	1	87.7	99%Morocco -1%Algeria	12%Morocco -88% Algeria
81	1315	Marine area around Filfla	Malta	111989	318.037	51.78	93.27	48% Malta -45% Italy -6% Libya	7%Malta -62% Italy -16% Tunisia -7%Algeria -5%France -1%Libya
82	1530	Marine area around Gozo	Malta	66503	384.284	78.07	98.03	23% Malta -64% Italy-10%Algeria-2%Libya	2%Malta -47%Italy -20%-Tunisia- 12%Algeria- 9%France- 5%Spain- 4%Libya
83	1558	Marine area at the Medina Graben	Malta	33098.3	349.528	83.06	97.75	18% Malta -67% Italy-2%Algeria-5%Libya -4%Greece	3%Malta -49%Italy -25%-Tunisia- 10%Algeria- 6%France- 4%Spain- 2%Libya
84	945	Marine area between San Dimitri Point (Gozo) and Il-Qaliet	Malta	73323.4	372.158	77.53	96.75	23% Malta -72% Italy -2%Libya -1%Algeria	3%Malta -49%Italy -21%-Tunisia- 20%Algeria- 6%France- 1%Spain
85	1531	Marine area in Western Maltese Sea	Malta	36021.7	278.893	76.21	96.49	24% Malta -70% Italy -3%Libya -1%Algeria	4%Malta -45%Italy -24%-Tunisia- 9%Algeria- 9%France- 8%Spain
86	1556	Marine area in the North Gozo Graben	Malta	67349.9	354.892	92.24	99.27	8% Malta -87% Italy -2%Algeria -2%Greece -1%Libya	0%Malta -57%Italy -22%-Tunisia- 7%Algeria- 5%France- 6%Spain
87	1562	Marine area in the Northwestern area of the Malta Graben	Malta	26122.6	322.346	94.29	99.55	6% Malta -90% Italy -2%Algeria	0%Malta -36%Italy -26%-Tunisia- 31%Algeria- 2%France- 3%Spain
88	1560	Marine area in the Western area of the Malta Graben	Malta	27191.3	328.665	89.72	98.95	10% Malta -86% Italy -1%Algeria -1%Libya	1%Malta -36%Italy -22%-Tunisia- 24%Algeria- 8%France- 4%Spain -2%Libya
89	943	Marine area within the limits of Għar Lapsi and Filfla	Malta	111989	318.037	51.78	93.27	48% Malta -45% Italy -6%Libya	7%Malta -63%Italy -16%-Tunisia- 7%Algeria- 5%France- 2%Spain -1%Libya
90	1535	The East Sea	Malta	75276.3	244.814	78.64	96.74	21% Malta -72% Italy -7%Libya	4%Malta -46%Italy -11%-Tunisia- 28%Algeria- 6%France- 3%Spain -2%Libya
91	1533	The North Sea	Malta	68255.4	359.069	88.5	99.57	12% Malta -84% Italy -4%Algeria	0%Malta -50%Italy -20%-Tunisia- 11%Algeria- 10%France- 5%Spain -4%Libya
92	1534	The Northeast Sea	Malta	82547.9	202.035	78.01	98.14	22% Malta -77% Italy -1%Libya	2%Malta -75%Italy -16%-Tunisia- 3%Algeria- 3%France- 2%Spain
93	1532	The Northwest Sea	Malta	28530.1	146.272	96.9	99.41	3% Malta -95% Italy -1%Tunisia	0%Malta -37%Italy -24%-Tunisia- 14%Algeria- 14%France- 10%Spain
94	1528	The South Sea	Malta	32634.4	362.7	81.58	96.78	18% Malta -71% Italy –5%Libya -2%Algeria	3%Malta -47%Italy -26%Tunisia- 12%Algeria- 5%France- 4%Spain -2%Libya
95	1536	The Southeast Sea	Malta	41480.8	304.543	88.6	97.78	11% Malta -68% Italy –17%Libya -4%Algeria	2%Malta -32%Italy -27%Tunisia- 29%Algeria- 3%France- 4%Spain -2%Libya
96	1529	The Southwest Sea	Malta	140247	322.053	55.16	89.93	46% Malta -48% Italy –5%Libya -1%Algeria	11%Malta -48%Italy -24%Tunisia- 8%Algeria- 5%France- 3%Spain
97	1205	Zembra	Tunisia	5256.76	13880.7	16.74	53.89	83%Tunisia -17%Algeria	46%Tunisia -42%Algeria -8%Spain -3%France -1%Italy
98	1210	Datça-Bozburun	Turkey	370660	1527.84	58.78	16.63	41% Turkey -34% Lebanon-19% Greece -2% Syria	83%Turkey -10%Greece –4%Syria -1%Cyprus
99	1211	Dilek Yarımadası	Turkey	1.68109e+06	5442.41	22.49	2.21	77% Turkey -22% Greece	98%Turkey -1%Greece
100	1212	Fethiye-Gocek	Turkey	1.32518e+06	3504.01	10.41	6.61	90% Turkey – 9% Greece - 1% Cyprus	93%Turkey -3% Greece -2%Syria -1%Cyprus
101	1213	Foça	Turkey	5104	0	0.04	-	100% Turkey	-
102	1215	Gökova	Turkey	301086	3430.3	68.01	10.95	31% Turkey -42% Lebanon -31% Turkey -22% Greece -3% Syria	89%Turkey -9%Greece
103	1216	Göksu Deltası	Turkey	4.05976e+06	5093.51	14.08	8.06	86% Turkey -3%Syria –10%Lebanon	92%Turkey -7%Syria
104	1743	Karaburun-Ildır Körfezi	Turkey	198307	706.002	22.33	15.15	78% Turkey –22%Greece	85%Turkey -15%Greece
105	1218	Kaş-Kekova	Turkey	636635	4091	3.66	9.06	96%Tukrey -2%Syria - 1%Cyprus	91%Turkey -2%Syria -1%Cyprus -1%Lebanon
106	1221	Patara	Turkey	1.56954e+06	5641.39	10.18	6.92	90%Turkey -6%Syria –2%Cyprus	93%Turkey -5% Syria
107	1223	Saros Korfezi	Turkey	73117.6	256.833	62.92	86.06	37%Turkey -62%Greece	14%Turkey -86% Greece

## Sheet: Natura 2000
#	N2000_ID	NAME	COUNTRY	Median microplastics concentration (#/km2)	Median macroplastics concentration (g/km2)
1	CY5000005	AKROTIRIO ASPRO - PETRA ROMIOU	Cyprus	112758	455.222
2	CY3000002	SPA KAVO GKREKO	Cyprus	245083	298.137
3	CY4000023	ZONI EIDIKIS PROSTASIAS CHERSONISOS AKAMA	Cyprus	169195	2445.8
4	ES6140014	Acantilados y Fondos Marinos de Calahonda-Castell de Ferro	Spain	72464.7	0
5	ES0000019	Aiguamolls de l'Alt Empordà	Spain	405957	592.094
6	ES6110015	Alborán	Spain	102494	1378.05
7	ES0000083	Arxipèlag de Cabrera	Spain	56546.9	970.631
8	ES5310005	Badies de Pollença i Alcúdia	Spain	71949.8	3344.24
9	ES0000506	Bahía de Almería	Spain	67970.7	1158.32
10	ES0000504	Bahía de Málaga-Cerro Gordo	Spain	182891	1673.4
11	ES0000046	Cabo de Gata-Níjar	Spain	35004.8	1038.63
12	ES5310128	Cap Enderrocat i cap Blanc	Spain	105130	1960.13
13	ES5310025	Cap de Barbaria	Spain	73269.8	1258.63
14	ES5120007	Cap de Creus	Spain	81560.1	200.034
15	ES5110020	Costes del Garraf	Spain	582687	1692.78
16	ES5110017	Costes del Maresme	Spain	3.01e+06	1050.25
17	ES0000020	Delta de l'Ebre	Spain	50896.1	629.455
18	ES6170037	El Saladillo - Punta de Baños	Spain	219024	765.494
19	ESZZ16009	Espacio marino de Cabo Roig	Spain	380176	6616.25
20	ES0000515	Espacio marino de Formentera y del sur de Ibiza	Spain	63914.5	1206.02
21	ES0000447	Espacio marino de Orpesa y Benicàssim	Spain	668803	1269.27
22	ES0000214	Espacio marino de Tabarca	Spain	550686	1979.48
23	ES0000508	Espacio marino de Tabarca-Cabo de Palos	Spain	273076	1660.95
24	ES0000514	Espacio marino de l'Empordà	Spain	84774.5	364.323
25	ES0000505	Espacio marino de la Isla de Alborán	Spain	103547	1378.05
26	ES0000507	Espacio marino de los Islotes Litorales de Murcia y Almería	Spain	477674	1238.42
27	ES0000513	Espacio marino del Baix Llobregat-Garraf	Spain	482550	1461.95
28	ES0000512	Espacio marino del Delta de l'Ebre-Illes Columbretes	Spain	46571	799.942
29	ESZZ16010	Espacio marino del entorno de Illes Columbretes	Spain	65151.6	684.795
30	ES0000517	Espacio marino del levante de Ibiza	Spain	36670.7	639.566
31	ES0000520	Espacio marino del norte de Mallorca	Spain	71949.8	2000.9
32	ES0000521	Espacio marino del norte y oeste de Menorca	Spain	47950.2	1299.2
33	ES0000519	Espacio marino del poniente de Mallorca	Spain	71501	1615.23
34	ES0000516	Espacio marino del poniente y norte de Ibiza	Spain	42205.6	1711.96
35	ES0000518	Espacio marino del sur de Mallorca y Cabrera	Spain	97925.4	1464.02
36	ES0000522	Espacio marino del sureste de Menorca	Spain	61037.9	1287.58
37	ES0000337	Estrecho	Spain	365371	735.391
38	ES6120032	Estrecho Oriental	Spain	372059	618.499
39	ES6110010	Fondos Marinos Levante Almeriense	Spain	176171	2428.62
40	ES6110009	Fondos Marinos de Punta Entinas-Sabinar	Spain	31130	1364.09
41	ES6200029	Franja Litoral Sumergida de la Región de Murcia	Spain	273255	2939.11
42	ES0000121	Illots de Benidorm i Serra Gelada	Spain	299826	1027.35
43	ES5310023	Illots de Ponent d'Eivissa	Spain	61884.8	3173.56
44	ES0000256	Islas Hormigas	Spain	164833	3684.21
45	ES5140001	Litoral meridional tarragoní	Spain	186374	413.56
46	ES0000260	Mar Menor	Spain	71960	5961.88
47	ES6200030	Mar Menor	Spain	71960	5961.88
48	ES0000510	Plataforma-talud marinos del Cabo de la Nao	Spain	63071.5	1288.19
49	ES0000084	Ses Salines d'Eivissa i Formentera	Spain	26537.2	852.18
50	ES6200048	Valles submarinos del Escarpe de Mazarrón	Spain	143430	1710.7
51	ES0000471	l'Albufera (ZEPA)	Spain	510743	730.656
52	ES5310097	Àrea marina Costa de Llevant	Spain	30839.6	17308.9
53	ES5310111	Àrea marina Platja de Migjorn	Spain	105681	1102.17
54	ES5310110	Àrea marina Platja de Tramuntana	Spain	22318.7	352.156
55	ES5310073	Àrea marina Punta Prima - Illa de l'Aire	Spain	51502.7	981.005
56	ES5310107	Àrea marina de Tagomago	Spain	79918.5	630.178
57	FR9400570	Agriates	France	74297.9	814.813
58	FR9301573	Baie et cap d'Antibes - îles de Lerins	France	2.49119e+06	1556.39
59	FR9102014	Bancs sableux de l'Espiguette	France	1.41992e+06	470.983
60	FR9402015	Bouches de Bonifacio, Iles des Moines	France	60938.7	584.491
61	FR9301602	Calanques et îles marseillaises - Cap Canaille et massif du Grand Caunet	France	1.11571e+06	555.347
62	FR9301592	Camargue	France	139459	210.272
63	FR9310019	Camargue	France	67943.5	210.272
64	FR9112034	Cap Bear- cap Cerbère	France	100454	292.455
65	FR9301996	Cap Ferrat	France	4.319e+06	2166.91
66	FR9301995	Cap Martin	France	6.53482e+06	2799.3
67	FR9301610	Cap Sicie - Six Fours	France	2.06474e+06	1136.05
68	FR9402018	Cap rossu, Scandola, Pointe de la Reveletta, Canyon de Calvi	France	103364	497.169
69	FR9412010	Capu Rossu , Scandola, revellata, Calvi	France	80886	497.54
70	FR9301624	Corniche Varoise	France	1.62548e+06	1130.53
71	FR9101436	Cours inférieur de l'Aude	France	537681	291.514
72	FR9301999	Côte Bleue Marine	France	1.66025e+06	451.309
73	FR9112035	Côte languedocienne	France	598512	281.113
74	FR9102013	Côtes sableuses de l'infralittoral Languedocien	France	137431	134.567
75	FR9301997	Embiez - cap Sicie	France	1.20519e+06	1006.99
76	FR9301628	Esterel	France	4.17955e+06	1153.57
77	FR9402017	Golfe d'Ajaccio	France	388439	860.382
78	FR9402014	Grand herbier de la côte orientale	France	340564	889.621
79	FR9410022	Iles Cerbicale	France	164252	640.104
80	FR9400587	Iles Cerbicale et frange littoral	France	192320	728.406
81	FR9410097	Iles Finocchiarola et Côte Nord	France	29270.4	0
82	FR9410021	Iles Lavezzi, Bouches de Bonifacio	France	60938.7	584.491
83	FR9312007	Iles Marseillaises - Cassidaigne	France	1.11571e+06	555.347
84	FR9410096	Iles Sanguinaires, golfe d'Ajaccio	France	388439	860.382
85	FR9310020	Iles d'Hyères	France	1.17031e+06	776.182
86	FR9412011	Oiseaux marins de l’Agriate	France	35724.2	378.343
87	FR9112038	Oiseaux marins sud golfe du Lion	France	22485.8	330.67
88	FR9400591	Plateau de Pertusato/ Bonifacio et îles Lavezzi	France	92465.7	411.523
89	FR9402013	Plateau du Cap Corse	France	102125	794.536
90	FR9412009	Plateau du Cap Corse	France	165342	1122.48
91	FR9400574	Porto/Scandola/Revellata/Calvi/Calanches de Piana (zone terrestre et marine)	France	124633	758.867
92	FR9101413	Posidonies de la côte palavasienne	France	2.83644e+06	577.444
93	FR9101414	Posidonies du cap d'Agde	France	784665	230.923
94	FR9102012	Prolongement en mer des Cap et étang de Leucate	France	221859	244.88
95	FR9301613	Rade d'Hyères	France	1.17031e+06	776.182
96	GR4110002	AGIOS EFSTRATIOS KAI PARAKTIA THALASSIA ZONI	Greece	1811.39	9.1922
97	GR1250004	ALYKI KITROUS - EVRYTERI PERIOCHI	Greece	1.34116e+06	1642
98	GR4220023	ANAFI, ANATOLIKO KAI VOREIO TMIMA KAI GYRO NISIDES KAI THALASSIA PERIOCHI	Greece	106010	419.928
99	GR4220002	ANAFI: CHERSONISOS KALAMOS - ROUKOUNAS	Greece	60478	319.827
100	GR4210021	ANATOLIKO TMIMA ASTYPALEAS KAI NISIDES KOUNOUPI, FTENO, CHONDROPOULO, KOYTSOMYTIS, MONI, AGIA KYRIAKI, TIGANI, CHONDRI, LIGNO, FOKIONISIA, KATSAGRELI, PONTIKOYSSA, FIDOYSSA, KTENIA KAI THALASSIA PERIOCHI	Greece	123446	614.966
101	GR4210025	ANATOLIKO TMIMA NISOU SYMIS KAI NISIDES KOULOUNDROS SESKLI, TROUMPETO, MARMARAS, KARAVALONISI, MEGALONISI, GIALESINO, OXEIA, CHONDROS, PLATY, NIMOS KAI THALASSIA PERIOCHI NISOU SYMIS	Greece	217845	1002.73
102	GR4220028	ANDROS: KENTRIKO KAI NOTIO TMIMA, GYRO NISIDES KAI PARAKTIA THALASSIA ZONI	Greece	13497.4	382.037
103	GR4210010	ARKOI, LEIPSOI, AGATHONISI KAI VRACHONISIDES	Greece	747177	1770.11
104	GR4210009	ASTYPALAIA: ANATOLIKO TMIMA, GYRO NISIDES KAI OFIDOUSSA KAI THALASSIA ZONI (AKR. LANTRA - AKR. VRYSI)	Greece	150442	461.222
105	GR2310015	DELTA ACHELOOU, LIMNOTHALASSA MESOLONGIOU - AITOLIKOU KAI EKVOLES EVINOU, NISOI ECHINADES, NISOS PETALAS, DYTIKOS ARAKYNTHOS KAI STENA KLEISOURAS	Greece	334566	1272.08
106	GR2310001	DELTA ACHELOOU, LIMNOTHALASSA MESOLONGIOU - AITOLIKOU, EKVOLES EVINOU, NISOI ECHINADES, NISOS PETALAS	Greece	334566	1272.08
107	GR1220010	DELTA AXIOU - LOUDIA - ALIAKMONA - ALYKI KITROUS	Greece	3.97054e+06	3683.65
108	GR1220002	DELTA AXIOU - LOUDIA - ALIAKMONA – EVRYTERI PERIOCHI - AXIOUPOLI	Greece	6.59992e+06	5725.3
109	GR1150010	DELTA NESTOU KAI LIMNOTHALASSES KERAMOTIS - EVRYTERI PERIOCHI KAI PARAKTIA ZONI	Greece	52466.4	118.41
110	GR1150001	DELTA NESTOU KAI LIMNOTHALASSES KERAMOTIS KAI NISOS THASOPOULA	Greece	33817.3	27.6193
111	GR4320011	DIONYSADES NISOI KAI THALASSIA ZONI	Greece	200390	860.601
112	GR2220005	DYTIKES AKTES KEFALONIAS - STENO KEFALONIAS ITHAKIS - VOREIA ITHAKI (AKROTIRIA GERO GKOMPOS - DRAKOU PIDIMA - KENTRI - AG. IOANNIS)	Greece	225717	1345.11
113	GR2210001	DYTIKES KAI VOREIOANATOLIKES AKTES ZAKYNTHOU	Greece	59332	618.351
114	GR2120001	EKVOLES (DELTA) KALAMA	Greece	1.12072e+06	3090.42
115	GR2540003	EKVOLES EVROTA, PERIOCHI VRONTAMA KAI THALASSIA PERIOCHI LAKONIKOU KOLPOU	Greece	181828	1419.81
116	GR2220003	ESOTERIKO ARCHIPELAGOS IONIOU (MEGANISI, ARKOUDI, ATOKOS, VROMONAS)	Greece	241088	1204.06
117	GR3000003	ETHNIKO PARKO SCHINIA - MARATHONA	Greece	682744	1954.75
118	GR1430004	ETHNIKO THALASSIO PARKO ALONNISOU – VOREION SPORADON, ANATOLIKI SKOPELOS	Greece	28266.7	192.198
119	GR1110004	FENGARI SAMOTHRAKIS, ANATOLIKES AKTES, VRACHONISSIDA ZOURAFA KAI THALASSIA ZONI	Greece	61464.5	79.6137
120	GR4220004	FOLEGANDROS ANATOLIKI MECHRI DYTIKI SIKINO KAI THALASSIA ZONI	Greece	58610.4	243.67
121	GR4120004	IKARIA - FOURNOI KAI PARAKTIA ZONI	Greece	116467	417.142
122	GR3000018	KANALI MAKRONISOU	Greece	13664	0
123	GR4210001	KASOS KAI KASONISIA – EVRYTERI THALASSIA PERIOCHI	Greece	154429	1114.28
124	GR4210004	KASTELLORIZO KAI NISIDES RO KAI STRONGYLI KAI PARAKTIA THALASSIA ZONI	Greece	514370	3069.17
125	GR2210002	KOLPOS LAGANA ZAKYNTHOU (AKR. GERAKI - KERI) KAI NISIDES MARATHONISI KAI PELOUZO	Greece	307075	338.692
126	GR1150009	KOLPOS PALAIOU - ORMOS ELEFTHERON	Greece	250540	0
127	GR4110003	LESVOS: DYTIKI CHERSONISOS - APOLITHOMENO DASOS	Greece	17502.4	619.419
128	GR4110006	LIMNOS, LIMNES CHORTAROLIMNI KAI ALYKI, KOLPOS MOUDROU ELOS DIAPORI KAI CHERSONISOS FAKOS, NISOS SERGITSI KAI NISIDES DIAVATES KOMPIOKASTRIA, TIGANI, KARKALAS, PRASONISI KAI THALASSIA PERIOCHI	Greece	23861.5	159.135
129	GR4110001	LIMNOS: CHORTAROLIMNI - LIMNI ALYKI KAI THALASSIA PERIOCHI	Greece	57813.3	192.963
130	GR2240001	LIMNOTHALASSES STENON LEFKADAS (PALIONIS - AVLIMON) KAI ALYKES LEFKADAS	Greece	1.18864e+06	5981.84
131	GR4220021	MIKRES KYKLADES, VOREIOANATOLIKI AMORGOS, ANATOLIKES AKTES DONOUSAS, GYRO NISIDES KAI THALASSIA PERIOCHI	Greece	42861.3	256.17
132	GR4220013	MIKRES KYKLADES: IRAKLEIA, SCHOINOUSSA, KOUFONISIA, KEROS, ANTIKERIA KAI THALASSIA ZONI	Greece	15189.6	113.908
133	GR4130002	NISIA ANTIPSARA KAI NISIDES DASKALIO, MASTROGIORGI, PRASONISI, KATO NISI, MESIAKO, KOYTSOYLIA KAI THALASSIA ZONI	Greece	14111.6	71.2788
134	GR1430005	NISIA KYRA PANAGIA, PIPERI, PSATHOURA KAI GYRO NISIDES AGIOS GEORGIOS, NISOI ADELFOI, LECHOUSA, GAIDOURONISIA	Greece	15789.3	91.9033
135	GR1430009	NISIDES ASPRONISOS, ARNKOS, MARANKOS, REPI, TSOUNKRIA, TSOUNKRIAKI KAI THALASSIA PERIOCHI NISON SKIATHOU KAI SKOPELOU	Greece	283091	630.571
136	GR4210019	NISIDES KALYMNOU: EPANO NERA, SARI, TELENDOS KAI THALASSIA PERIOCHI	Greece	1.28863e+06	2034.23
137	GR4110009	NISIDES LESVOU (SYMPLEGMA TOMARONISION, KODONAS, AGIOS GEORGIOS, GLARONISI, KLP) KAI THALASSIA PERIOCHI)	Greece	354531	277.192
138	GR4220027	NISIDES MYKONOU: RINEIA, CHTAPODIA, KAI TRAGONISI KAI THALASSIA PERIOCHI	Greece	26558.4	281.432
139	GR4220025	NISIDES PAROU KAI NOTIA ANTIPAROS KAI THALASSIA PERIOCHI	Greece	44460.9	254.711
140	GR3000020	NISIDES SARONIKOU KOLPOU KAI THALASSIA PERIOCHI	Greece	212484	1038.13
141	GR2420009	NISIDES SKYROU KAI THALASSIA PERIOCHI	Greece	41573.4	178.769
142	GR2210004	NISIDES STAMFANI KAI ARPYIA (STROFADES) KAI THALASSIA ZONI	Greece	80450.1	170.508
143	GR4210034	NISIDES VOREION DODEKANISON KAI THALASSIA PERIOCHI	Greece	712058	1164.53
144	GR4220022	NISOI CHRISTIANA	Greece	120876	490.899
145	GR4220017	NISOI DESPOTIKO KAI STRONGYLO KAI THALASSIA ZONI	Greece	25819.3	0
146	GR4210020	NISOI KINAROS KAI LEVITHA KAI NISIDES LIADIA, PLAKA, GLAROS, MAVRA KAI THALASSIA PERIOCHI	Greece	186460	246.871
147	GR2230004	NISOI PAXOI KAI ANTIPAXOI KAI EVRYTERI THALASSIA PERIOCHI	Greece	108404	833.13
148	GR2210003	NISOI STROFADES	Greece	34763.1	11.8666
149	GR4110014	NISOS AGIOS EFSTRATIOS KAI THALASSIA ZONI	Greece	17434.8	76.9219
150	GR4220007	NISOS ANTIMILOS - THALASSIA PARAKTIA ZONI	Greece	40530.8	213.444
151	GR4210026	NISOS CHALKI KAI NISIDES: KOLOFONA, PANO PRASSOUDA, TRAGOUSA, STRONGYLI, AGIOS THEODOROS, MAELONISI ALIMIA, KREVVATI, NISAKI, MAKRY KAI THALASSIA PERIOCHI	Greece	489977	1324.47
152	GR4120006	NISOS FOURNOI KAI NISIDES THYMAINA ALATONISI, THYMAINAKI, STRONGYLO, PLAKA, MAKRONISI, MIKROS KAI MEGALOS ANTHROPOFAGOS, AGIOS MINAS KAI THALASSIA PERIOCHI	Greece	178453	333.922
153	GR4220033	NISOS GYAROS KAI THALASSIA ZONI	Greece	69028	300.512
154	GR4210028	NISOS KASOS KAI SYMPLEGMA KASONISION KAI THALASSIA PERIOCHI	Greece	314111	1210.74
155	GR4220006	NISOS POLYAIGOS - KIMOLOS	Greece	76285.9	435.912
156	GR4210024	NISOS TILOS KAI NISIDES: ANTITILOS, PELEKOUSA, GAIDOURONISI, GIAKOUMIS, AGIOS ANDREAS, PRASOUDA , NISI KAI THALASSIA PERIOCHI	Greece	313659	1366.51
157	GR4210007	NOTIA NISYROS KAI STRONGYLI, IFAISTIAKO PEDIO KAI PARAKTIA THALASSIA ZONI	Greece	142005	933.125
158	GR4340023	NOTIODYTIKI GAVDOS KAI GAVDOPOULA KAI THALASSIA PERIOCHI	Greece	25463.9	89.3066
159	GR2540001	ORI GIDOVOUNI, CHIONOVOUNI, GAIDOUROVOUNI, KORAKIA, KALOGEROVOUNI, KOULOCHERA KAI PERIOCHI MONEMVASIAS SPILAIO SOLOMOU TRYPA KAI PYRGOS AG. STEFANOU KAI THALASSIA ZONI EOS AKROTIRIO KAMILI	Greece	157398	674.244
160	GR1270002	OROS ITAMOS - SITHONIA	Greece	6694.71	357.647
161	GR2420001	OROS OCHI – KAMPOS KARYSTOU – POTAMI – AKROTIRIO KAFIREFS – PARAKTIA THALASSIA ZONI	Greece	50272.2	407.019
162	GR2420012	OROS OCHI, PARAKTIA ZONI KAI NISIDES	Greece	36580.7	394.371
163	GR1430001	OROS PILIO KAI PARAKTIA THALASSIA ZONI- SPILAIA MALAKI KAI SKEPONI	Greece	149567	1461.33
164	GR1270008	PALIOURI – AKROTIRI KAI THALASSIA ZONI	Greece	30301.1	356.301
165	GR2330007	PARAKTIA THALASSIA ZONI APO AKR. KYLLINI EOS TOUMPI - KALOGRIA	Greece	429709	1522.91
166	GR4220005	PARAKTIA ZONI DYTIKIS MILOY	Greece	104508	391.602
167	GR4340015	PARALIA APO CHRYSOSKALITISSA MECHRI AKROTIRIO KRIOS	Greece	7384.36	0
168	GR1270009	PLATANITSI - SYKIA: ΑKR. RIGAS - AKR. ADOLO	Greece	170815	489.144
169	GR1110012	SAMOTHRAKI: OROS FENGARI KAI PARAKTIA ZONI	Greece	68051.3	80.2024
170	GR4220029	SERIFOS: PARAKTIA ZONI KAI NISIDES SERIFOPOULA, PIPERI KAI VOUS	Greece	46331.9	1642.96
171	GR1430003	SKIATHOS: KOUKOUNARIES KAI EVRYTERI THALASSIA PERIOCHI	Greece	388495	1131.37
172	GR3000005	SOUNIO - NISIDA PATROKLOU KAI PARAKTIA THALASSIA ZONI	Greece	189916	676.806
173	GR4110016	THALASSIA PERIOCHI DYTIKIS LESVOU	Greece	35383.7	345.055
174	GR1150014	THALASSIA PERIOCHI KAVALAS - THASOU	Greece	166795	329.906
175	GR2330008	THALASSIA PERIOCHI KOLPOU KYPARISSIAS: AKR. KATAKOLO - KYPARISSIA	Greece	598900	953.174
176	GR3000019	THALASSIA PERIOCHI KYTHIRON	Greece	51182	614.533
177	GR2420016	THALASSIA PERIOCHI NOTIOU EVVOIKOU KOLPOU	Greece	542611	1816.88
178	GR1270016	THALASSIA ZONI ANATOLIKA KAI NOTIA CHERSONISOU ATHONA	Greece	51177.6	495.753
179	GR4220012	VOREIA AMORGOS KAI KINAROS, LEVITHA, MAVRA, GLAROS KAI THALASSIA ZONI	Greece	174202	412.666
180	GR4210003	VOREIA KARPATHOS KAI SARIA KAI PARAKTIA THALASSIA ZONI	Greece	5855.45	2840.86
181	GR4320006	VOREIOANATOLIKO AKRO KRITIS: DIONYSADES, ELASA KAI CHERSONISOS SIDERO (AKRA MAVRO MOURI – VAI – AKRA PLAKAS) KAI THALASSIA ZONI	Greece	233470	935.243
182	GR4220010	VOREIODYTIKI KYTHNOS: OROS ATHERAS - AKROTIRIO KEFALOS KAI PARAKTIA ZONI	Greece	175794	8.5017
183	GR4210011	VRACHONISIA NOTIOU AIGAIOU: VELOPOULA, FALKONERA, A0ES, CHRISTIANA, PACHEIA, FTENO, MAKRA, ASTAKIDONISIA, SYRNA - GYRO NISIA KAI THALASSIA ZONI	Greece	120876	490.899
184	GR2120005	YGROTOPOS EKVOLON KALAMA KAI NISOS PRASOUDI	Greece	1.12072e+06	3090.42
185	GR3000016	YGROTOPOS SCHINIA	Greece	682744	1954.75
186	HR3000170	Akvatorij uz Konavoske stijene	Croatia	30664.2	6.558
187	HR5000032	Akvatorij zapadne Istre	Croatia	117816	611.915
188	HR1000032	Akvatorij zapadne Istre	Croatia	90250.7	91.7651
189	HR3000098	Biševo more	Croatia	52443.4	708.643
190	HR1000033	Kvarnerski otoci	Croatia	21748.6	41.0801
191	HR3000426	Lastovski i Mljetski kanal	Croatia	101926	1094.3
192	HR1000038	Lastovsko otočje	Croatia	67891.1	1218.62
193	HR3000173	Medulinski zaljev	Croatia	129445	91.7651
194	HR3000153	Otok Korčula - od uvale Poplat do Vrhovnjaka	Croatia	81931.2	1453.62
195	HR3000097	Otok Vis - podmorje	Croatia	46485.3	2053.76
196	HR5000038	Park prirode Lastovsko otočje	Croatia	67891.1	1218.62
197	HR3000017	Podmorje otoka Suska	Croatia	2741.94	0
198	HR1000039	Pučinski otoci	Croatia	48198.4	967.637
199	HR3000469	Viški akvatorij	Croatia	62687.9	1088.95
200	IT9150003	Aquatina di Frigole	Italy	1.14362e+06	9220.2
201	ITB010008	Arcipelago La Maddalena	Italy	213163	918.836
202	ITA010027	Arcipelago delle Egadi - area marina e terrestre	Italy	125306	442.197
203	ITA030044	Arcipelago delle Eolie - area marina e terrestre	Italy	161491	640.348
204	ITA040013	Arcipelago delle Pelagie - area marina e terrestre	Italy	26793.1	412.636
205	ITA090031	Area Marina di Capo Passero	Italy	203541	120.975
206	ITB020012	Berchida e Bidderosa	Italy	62721.9	28.1513
207	IT9220055	Bosco Pantano di Policoro e Costa Ionica Foce Sinni	Italy	327194	132.337
208	ITB010009	Capo Figari e Isola Figarolo	Italy	755862	1076.76
209	ITB013018	Capo Figari, Cala Sabina, Punta Canigione e Isola Figarolo	Italy	755862	1076.76
210	ITB040030	Capo Pecora	Italy	2388.57	0
211	ITB010007	Capo Testa	Italy	161709	629.196
212	ITB042216	Capo di Pula	Italy	817029	208.613
213	IT9220080	Costa Ionica Foce Agri	Italy	209208	67.1859
214	IT9220095	Costa Ionica Foce Cavone	Italy	323551	136.628
215	IT9350300	Costa Viola	Italy	6.52992e+06	4578.68
216	ITB040021	Costa di Cagliari	Italy	309917	293.247
217	ITB043035	Costa e Entroterra tra Punta Cannoni e Punta delle Oche - Isola di San Pietro	Italy	1622.17	0
218	IT5320005	Costa tra Ancona e Portonovo	Italy	140197	0
219	ITB010043	Coste e Isolette a Nord Ovest della Sardegna	Italy	3.19868e+06	7.8391
220	IT8030006	Costiera amalfitana tra Nerano e Positano	Italy	703417	24.4366
221	IT3270023	Delta del Po	Italy	818391	9725.13
222	IT3270017	Delta del Po: tratto terminale e delta veneto	Italy	818391	9725.13
223	IT9130003	Duna di Campomarino	Italy	154988	284.149
224	IT1315670	Fondali Capo Berta - Diano Marina - Capo Mimosa	Italy	6.77779e+06	1295.05
225	IT9310036	Fondali Isola di Cirella-Diamante	Italy	3198.09	0
226	IT1324973	Fondali Loano - Albenga	Italy	3.05542e+06	3251.01
227	IT1315971	Fondali Porto Maurizio - San Lorenzo al Mare - Torre dei Marmi	Italy	1.9928e+06	711.988
228	IT1333371	Fondali Punta Manara	Italy	6.05599e+06	878.045
229	IT1316274	Fondali San Remo - Arziglia	Italy	1.3542e+06	1441.32
230	IT6000002	Fondali antistanti Punta Morelle	Italy	1.18596e+06	1328.32
231	IT9350172	Fondali da Punta Pezzo a Capo dell'Armi	Italy	51716.3	0
232	ITA090030	Fondali del Plemmirio	Italy	98176.8	8.6096
233	ITA010024	Fondali dell'Arcipelago delle Isole Egadi	Italy	109147	527.671
234	ITA020046	Fondali dell'isola di Ustica	Italy	168673	704.848
235	ITA040014	Fondali delle Isole Pelagie	Italy	12485.1	241.537
236	IT8030010	Fondali marini di Ischia, Procida e Vivara	Italy	1.7394e+06	1524.41
237	IT8030011	Fondali marini di Punta Campanella e Capri	Italy	746520	24.4366
238	IT6000013	Fondali tra Capo Circeo e Terracina	Italy	261548	1519.12
239	IT6000012	Fondali tra Capo Portiere e Lago di Caprolace (foce)	Italy	2.48199e+06	2050.12
240	IT6000004	Fondali tra Marina di Tarquinia e Punta della Quaglia	Italy	2.53088e+06	1821.72
241	IT6000011	Fondali tra Torre Astura e Capo Portiere	Italy	1.67621e+06	1563.17
242	IT6000003	Fondali tra le foci del Torrente Arrone e del Fiume Marta	Italy	1.73165e+06	2092.7
243	ITB020014	Golfo di Orosei	Italy	352885	775.106
244	ITB010001	Isola Asinara	Italy	42050	285.456
245	ITB012211	Isola Rossa - Costa Paradiso	Italy	2118.69	0
246	ITB010082	Isola dell'Asinara	Italy	53409.8	320.828
247	IT5160006	Isola di Capraia - area terrestre e marina	Italy	200284	2177.17
248	IT5160007	Isola di Capraia - area terrestre e marina	Italy	200284	2177.17
249	IT51A0024	Isola di Giannutri - area terrestre e marina	Italy	256387	499.125
250	IT5160002	Isola di Gorgona - area terrestre e marina	Italy	188653	1310.83
251	IT5160014	Isola di Montecristo e Formica di Montecristo - area terrestre e marina	Italy	240349	660.018
252	ITA010030	Isola di Pantelleria e area marina circostante	Italy	67510.6	374.315
253	IT5160013	Isola di Pianosa - area terrestre e marina	Italy	168716	896.326
254	ITB040027	Isola di San Pietro	Italy	28380.3	370.525
255	ITB010010	Isole Tavolara, Molara e Molarotto	Italy	250936	171.588
256	ITB013019	Isole del Nord - Est tra Capo Ceraso e Stagno di San Teodoro	Italy	250936	171.588
257	IT6040019	Isole di Ponza, Palmarola, Zannone, Ventotene e S. Stefano	Italy	116320	272.981
258	IT9150032	Le Cesine	Italy	1.22986e+06	2933.94
259	IT9150015	Litorale di Gallipoli e Isola S. Andrea	Italy	193457	349.342
260	IT9150009	Litorale di Ugento	Italy	154591	1053.22
261	IT9220300	Mare della Magna Grecia	Italy	256234	136.628
262	ITA030042	Monti Peloritani, Dorsale Curcuraci, Antennamare e area marina dello stretto di Messina	Italy	1.45951e+06	4312.67
263	IT4070009	Ortazzo, Ortazzino, Foce del Torrente Bevano	Italy	1.24624e+06	9287.81
264	IT9150027	Palude del Conte, dune di Punta Prosciutto	Italy	207550	386.375
265	IT6040015	Parco Nazionale del Circeo	Italy	764161	1238.22
266	IT8050037	Parco marino di Punta degli Infreschi	Italy	277414	8.2792
267	IT8050036	Parco marino di S. Maria di Castellabate	Italy	235866	135.726
268	IT9130008	Posidonieto Isola di San Pietro - Torre Canneto	Italy	171158	205.668
269	IT9120009	Posidonieto San Vito - Barletta	Italy	2.4998e+06	8854.54
270	IT9150006	Rauccio	Italy	509152	1933.84
271	IT4060005	Sacca di Goro, Po di Goro, Valle Dindona, Foce del Po di Volano	Italy	1.45286e+06	19783.2
272	IT5160018	Secche della Meloria	Italy	1.93217e+06	2155.23
273	IT6000008	Secche di Macchiatonda	Italy	4.4447e+06	1808.92
274	IT6000010	Secche di Tor Paterno	Italy	6.28079e+06	1481.48
275	IT6000009	Secche di Torre Flavia	Italy	6.76635e+06	2939.61
276	IT9350160	Spiaggia di Brancaleone	Italy	164738	99.384
277	ITB040019	Stagni di Colostrai e delle Saline	Italy	194834	399.796
278	IT9140003	Stagni e Saline di Punta della Contessa	Italy	978619	2039.99
279	ITB034006	Stagno di Mistras	Italy	772654	928.812
280	ITB010002	Stagno di Pilo e di Casaraccio	Italy	75221	0
281	ITB013012	Stagno di Pilo, Casaraccio e Saline di Stintino	Italy	75221	0
282	ITB030038	Stagno di Putzu Idu (Salina Manna e Pauli Marigosa)	Italy	1488.5	0
283	IT3250047	Tegnùe di Chioggia	Italy	2.77435e+06	78675.2
284	IT9130001	Torre Colimena	Italy	189637	441.066
285	ITA050012	Torre Manfria, Biviere e Piana di Gela	Italy	457448	207.616
286	IT7120215	Torre del Cerrano	Italy	1.48282e+06	12660.5
287	MT0000110	Marine Zone in Southern Maltese Sea	Malta	32634.4	232.232
288	MT0000112	Marine area around Gozo	Malta	66503	418.726
289	MT0000102	Marine area between Għar Lapsi and Filfla	Malta	111989	318.037
290	MT0000105	Marine area between San Dimitri Point (Gozo) and Il-Qaliet	Malta	73323.4	364.403
291	MT0000107	Marine area in North-Eastern Maltese Sea	Malta	82547.9	196.168
292	MT0000114	Marine area in North-Western Maltese Sea	Malta	28530.1	146.272
293	MT0000106	Marine area in Northern Maltese Sea	Malta	68255.4	393.084
294	MT0000109	Marine area in South-Eastern Maltese Sea	Malta	41480.8	330.929
295	MT0000111	Marine area in South-Western Maltese area	Malta	140247	321.861
296	MT0000113	Marine area in Western Maltese Sea	Malta	36021.7	226.71
297	MT0000108	Marine area in the Eastern Maltese Sea	Malta	75276.3	196.064
	SI3000241	Ankaran - Sv. Nikolaj	Malta	0	0

## Sheet: CCH
#	Area	Median microplastics concentration (#/km2)	Median macroplastics concentration (g/km2)
1	Pelagos Sanctuary for Marine Mammals	95732.3	524.611
2	the strair of Sicily	35472.6	292.898
3	waters surrounding Malta	57857.1	202.792
4	Northern – western area of Sardinia	129525	448.904
5	Tuscany Archipelago	326665	595.608
6	Waters along east Coast of Cres-Losinj Archipelago	19040.8	190.053
7	Waters surrounding the island of Ischia(Tyrrhenian Sea)	778996	1115.86
8	The Sazani Island-Karaburuni Peninsula	501996	1612.16
9	Southwest Crete and the Hellenic Trench	40795.4	374.406
10	Waters sorroung the northern Sporades	32797.5	275.518
11	North Aegean	73950	416.219
12	Waters sourounding Dodecanese	302060	1019.67
13	Sallum marine protected area	84100.7	3498.34
14	The Alboran Sea and the strait of Giblartar	131461	1629.77
15	the Gulf of Saronikos and adjacent waters	147984	775.462
16	Kalamos	190436	1204.06
17	The eastern Ionian Sea and the Gulf of Corinth	135515	750.639
